# Supplementary material for: Tissue registration and exploration user interfaces in support of a human reference atlas
Source: PubMed Central journal article supplement (PMC9747802; doi:10.1038/s42003-022-03644-x), 2022-12-13

# Supplementary Information for “Tissue Registration and Exploration User Interfaces in support of a Human Reference Atlas”

Katy Börner<sup>1\*</sup>, Andreas Bueckle<sup>1\*</sup>, Bruce W. Herr II<sup>1</sup>, Leonard E. Cross<sup>1</sup>, Ellen M. Quardokus<sup>1</sup>, Elizabeth G. Record<sup>1</sup>, Yingnan Ju<sup>1</sup>, Jonathan C. Silverstein<sup>2</sup>, Kristen M. Browne<sup>3</sup>, Sanjay Jain<sup>4</sup>, Clive H. Wasserfall<sup>5</sup>, Marda L. Jorgensen<sup>5</sup>, Jeffrey M. Spraggins<sup>6</sup>, N. Heath Patterson<sup>7</sup>, Griffin M. Weber<sup>8</sup>

<sup>1</sup> Department of Intelligent Systems Engineering, Luddy School of Informatics, Computing, and Engineering, Indiana University, Bloomington, Indiana, USA

<sup>2</sup> Department of Biomedical Informatics, University of Pittsburgh School of Medicine, Pittsburgh, Pennsylvania, USA

<sup>3</sup> Bioinformatics and Computational Biosciences Branch, Office of Cyber Infrastructure and Computational Biology, National Institute of Allergy and Infectious Diseases, National Institutes of Health, Bethesda, Maryland, USA

<sup>4</sup> Department of Medicine; Department of Pathology & Immunology; Department of Pediatrics Washington University School of Medicine, Saint Louis, Missouri, USA

<sup>5</sup> Departments of Pathology and Pediatrics, University of Florida, Gainesville, Florida, USA

<sup>6</sup> Department of Cell and Developmental Biology, Mass Spectrometry Research Center, Vanderbilt University School of Medicine, Nashville, Tennessee, USA

<sup>7</sup> Department of Biochemistry, Mass Spectrometry Research Center, Vanderbilt University School of Medicine, Nashville, Tennessee, USA

<sup>8</sup> Department of Biomedical Informatics, Harvard Medical School, Boston, Massachusetts, USA

\*Corresponding authors

Katy Börner [katy@indiana.edu](mailto:katy@indiana.edu)

Andreas Bueckle [abueckle@iu.edu](mailto:abueckle@iu.edu)

## **Table of Contents**

Supplementary Figure 1. HRA Dashboard

Supplementary Figure 2. Visualizing ASCT+B Table Data

Supplementary Table 1. ASCT+B Table Counts

Supplementary Figure 3. Registration User Interface Metadata

Supplementary Figure 4. Tissue Segmentation Mask Data

# Supplementary Figure 1. HRA Dashboard

Bar graphs with number of tissue blocks, tissue sections, and RUI locations per organ and tissue provider for HuBMAP data. An interactive version of this dashboard for all public HuBMAP data can be explored at <https://hubmapconsortium.github.io/hra-data-dashboard>. Note that EUI counts are higher as they include data by HCA, GTEx, and other non-HuBMAP consortia.

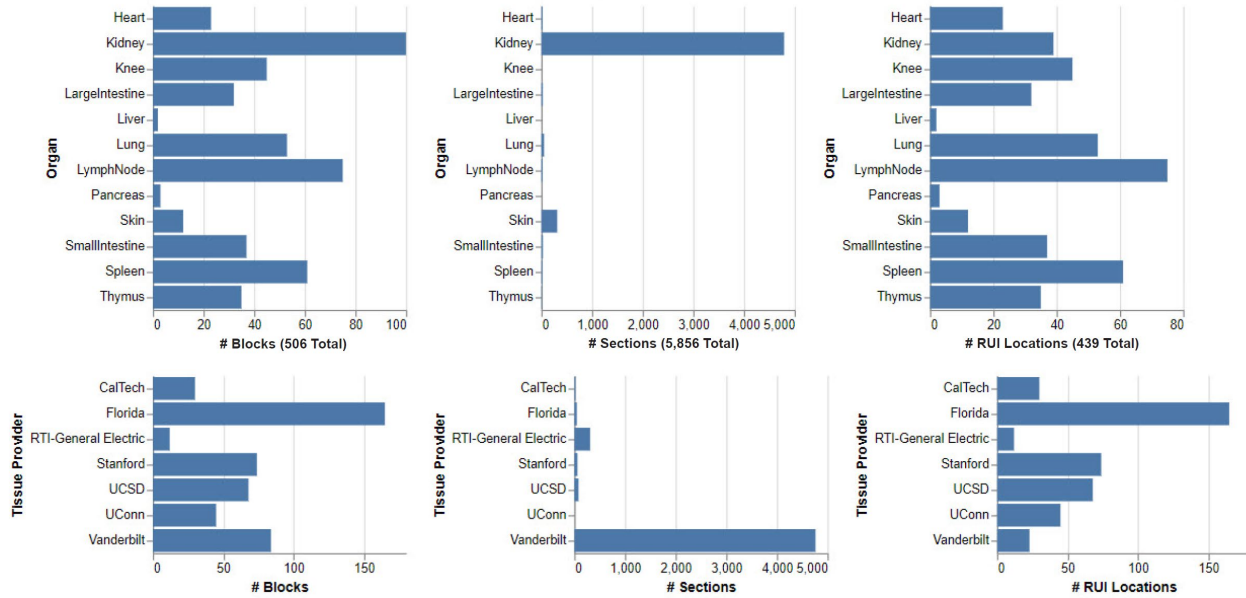

## Supplementary Figure 2. Visualizing ASCT+B Table Data

The kidney ASCT+B table captures anatomical structures (red nodes), cell types (blue), and biomarkers (green) and their interlinkages. Users can hover over a node to see details and other nodes linked to it.

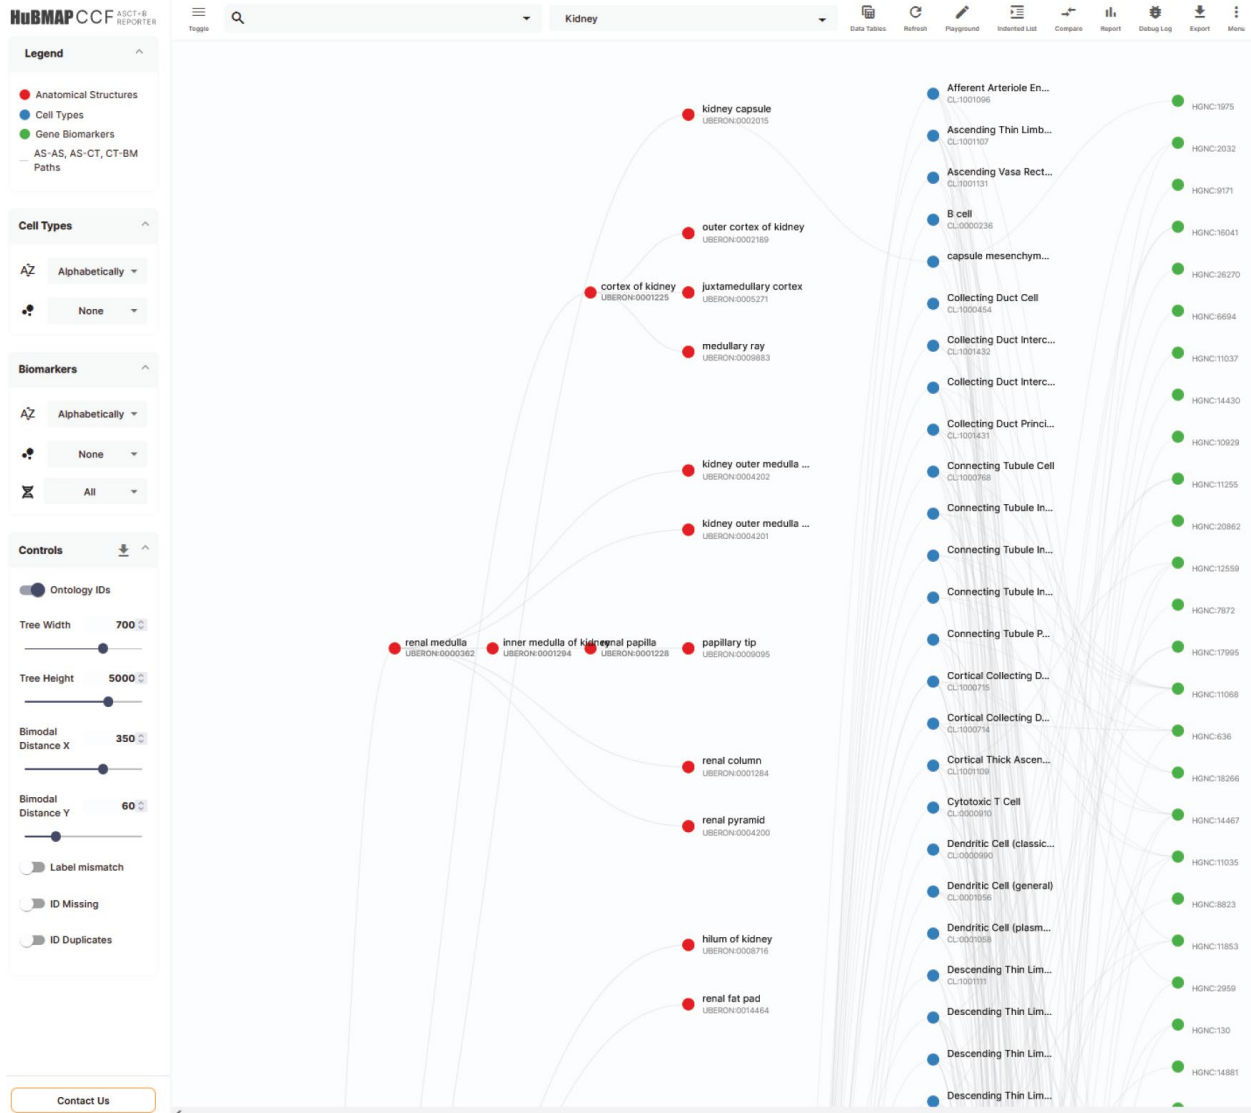

## Supplementary Table 1. ASCT+B Table Counts

Counts for anatomical structures (AS), cell-types (CT), and biomarkers (B) and their relationships for the 25 ASCT+B tables published in December 2021. BG is the abbreviation used for gene biomarkers (e.g., detected using RNA sequencing) while BP refers to protein biomarkers.

| Organ                                     | #AS | #CT | #B Total | #BG | #BP | #AS-AS | #AS-CT | #CT-B |
|-------------------------------------------|-----|-----|----------|-----|-----|--------|--------|-------|
| <a href="#">Blood</a>                     | 1   | 30  | 159      | 112 | 47  | 1      | 30     | 506   |
| <a href="#">Blood Vasculature</a>         | 841 | 2   | 1        | 1   | 0   | 869    | 606    | 2     |
| <a href="#">Bone Marrow</a>               | 1   | 47  | 262      | 198 | 64  | 1      | 47     | 838   |
| <a href="#">Brain</a>                     | 183 | 127 | 257      | 257 | 0   | 183    | 127    | 346   |
| <a href="#">Eye</a>                       | 26  | 53  | 136      | 61  | 75  | 27     | 58     | 404   |
| <a href="#">Fallopian Tube</a>            | 55  | 22  | 25       | 13  | 12  | 72     | 65     | 32    |
| <a href="#">Heart</a>                     | 50  | 23  | 45       | 45  | 0   | 60     | 183    | 74    |
| <a href="#">Kidney</a>                    | 61  | 62  | 150      | 150 | 0   | 62     | 60     | 257   |
| <a href="#">Knee</a>                      | 32  | 19  | 14       | 0   | 14  | 32     | 8      | 17    |
| <a href="#">Large Intestine</a>           | 54  | 57  | 167      | 84  | 83  | 287    | 1,156  | 352   |
| <a href="#">Liver</a>                     | 17  | 30  | 62       | 16  | 46  | 17     | 31     | 75    |
| <a href="#">Lung</a>                      | 146 | 83  | 180      | 174 | 6   | 909    | 1065   | 267   |
| <a href="#">Lymph Node</a>                | 34  | 45  | 223      | 106 | 117 | 43     | 86     | 499   |
| <a href="#">Lymph Vasculature</a>         | 4   | 1   | 1        | 1   | 0   | 4      | 2      | 1     |
| <a href="#">Ovary</a>                     | 71  | 7   | 13       | 7   | 6   | 109    | 12     | 5     |
| <a href="#">Pancreas</a>                  | 32  | 32  | 44       | 42  | 2   | 162    | 229    | 101   |
| <a href="#">Peripheral Nervous System</a> | 782 | 1   | 2        | 1   | 1   | 803    | 609    | 2     |
| <a href="#">Prostate</a>                  | 4   | 12  | 31       | 31  | 0   | 4      | 12     | 36    |
| <a href="#">Skin</a>                      | 15  | 36  | 70       | 0   | 70  | 17     | 19     | 101   |
| <a href="#">Small Intestine</a>           | 38  | 48  | 13       | 13  | 0   | 69     | 185    | 13    |
| <a href="#">Spleen</a>                    | 37  | 61  | 194      | 85  | 109 | 50     | 129    | 424   |
| <a href="#">Thymus</a>                    | 17  | 52  | 394      | 318 | 76  | 28     | 39     | 620   |
| <a href="#">Ureter</a>                    | 7   | 14  | 30       | 30  | 0   | 7      | 14     | 61    |

|                                 |              |            |              |              |            |              |              |              |
|---------------------------------|--------------|------------|--------------|--------------|------------|--------------|--------------|--------------|
| <a href="#">Urinary Bladder</a> | 16           | 15         | 30           | 30           | 0          | 16           | 16           | 63           |
| <a href="#">Uterus</a>          | 58           | 19         | 45           | 39           | 6          | 73           | 28           | 65           |
| <b>Totals:</b>                  | <b>2,582</b> | <b>898</b> | <b>2,548</b> | <b>1,814</b> | <b>734</b> | <b>3,905</b> | <b>4,816</b> | <b>5,161</b> |

## Supplementary Figure 3. Registration User Interface Metadata

Exemplary JSON file with metadata for one tissue block registered in the left male kidney reference organ (left) and corresponding RUI user interface elements (right). Tissue block dimensions are entered by users via RUI and captured in JSON file—as well as tissue block location, rotation but also six anatomical structure tags (see Uberon URLs in JSON). The JSON file can be explored in the Supporting Information website at [https://cns-iu.github.io/HRA-supporting-information/rui\\_registration.json](https://cns-iu.github.io/HRA-supporting-information/rui_registration.json).

```
{
  "@context": "https://hubmapconsortium.github.io/hubmap-ontology/ccf-context.jsonld",
  "@id": "http://purl.org/ccf/1.5/bdf64f94-ccd8-484f-8eaa-a99fb9d125e8",
  "@type": "SpatialEntity",
  "creator": "Jane Doe",
  "creator_first_name": "Jane",
  "creator_last_name": "Doe",
  "creation_date": "2022-04-20",
  "ccf_annotations": [
    "http://purl.obolibrary.org/obo/UBERON_0002015",
    "http://purl.obolibrary.org/obo/UBERON_0000362",
    "http://purl.obolibrary.org/obo/UBERON_0004200",
    "http://purl.obolibrary.org/obo/UBERON_0001225",
    "http://purl.obolibrary.org/obo/UBERON_0001284",
    "http://purl.obolibrary.org/obo/UBERON_0002189"
  ],
  "x_dimension": 10,
  "y_dimension": 12,
  "z_dimension": 15,
  "dimension_units": "millimeter",
  "placement": {
    "@context": "https://hubmapconsortium.github.io/hubmap-ontology/ccf-context.jsonld",
    "@id": "http://purl.org/ccf/1.5/bdf64f94-ccd8-484f-8eaa-a99fb9d125e8_placement",
    "@type": "SpatialPlacement",
    "target": "http://purl.org/ccf/latest/ccf.owl#VHMLLeftKidney",
    "placement_date": "2022-04-20",
    "x_scaling": 1,
    "y_scaling": 1,
    "z_scaling": 1,
    "scaling_units": "ratio",
    "x_rotation": -18,
    "y_rotation": 82,
    "z_rotation": 0,
    "rotation_order": "XYZ",
    "rotation_units": "degree",
    "x_translation": 28.286,
    "y_translation": 67.027,
    "z_translation": 41.215,
    "translation_units": "millimeter"
  }
}
```

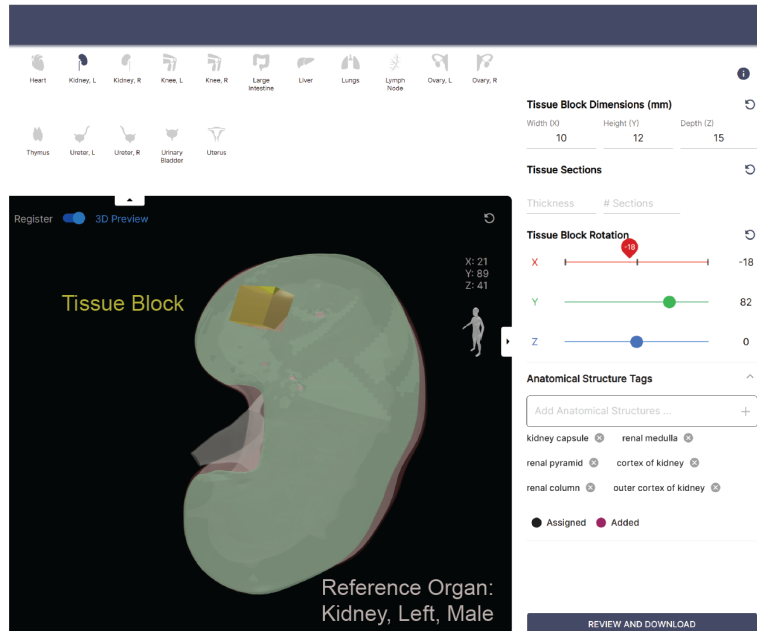

## Supplementary Figure 4. Tissue Segmentation Mask Data

Exemplary JSON file for a segmentation mask for a kidney FTU on left. Kidney whole slide image (scale bar: 2mm) with zoom into one glomerulus FTU annotation on right (scale bar: 50 $\mu$ m). The segmentation mask consists of a 14-segment polyline. The x-y coordinates for the 15 points are highlighted in yellow in the JSON file. Note that the first set of coordinates is identical to the last—closing the polyline.

```
{
  "type": "Feature",
  "id": "PathAnnotationObject",
  "geometry": {
    "type": "Polygon",
    "coordinates": [
      [
        [26499, 2968],
        [26459, 2976],
        [26427, 3007],
        [26413, 3047],
        [26414, 3099],
        [26436, 3141],
        [26468, 3171],
        [26522, 3193],
        [26567, 3193],
        [26601, 3177],
        [26625, 3120],
        [26623, 3078],
        [26601, 3024],
        [26543, 2976],
        [26499, 2968]
      ]
    ]
  },
  "properties": {
    "classification": {
      "name": "glomerulus",
      "colorRGB": -2315298
    },
    "isLocked": false,
    "measurements": [
      {
        "name": "detection_source",
        "value": 0.995274
      }
    ]
  }
}
```

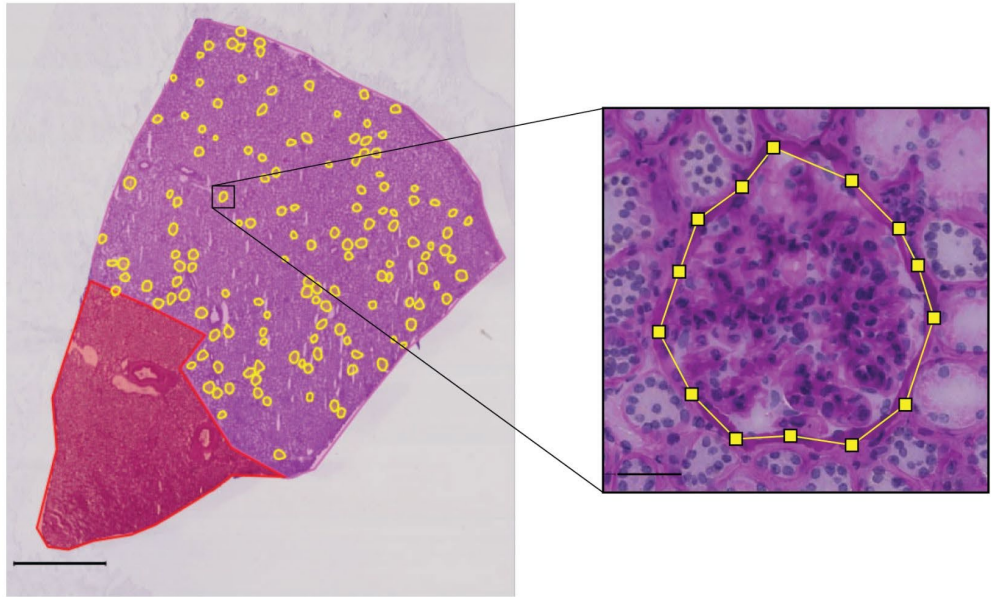

Supplement: 42003_2022_3644_MOESM1_ESM.pdf [file 42003_2022_3644_MOESM1_ESM.pdf]
